## ACKNOWLEDGMENT

The Editor-in-Chief and the Editors of ANESTHESIOLOGY wish to thank the following consultants and referees for making available their expert knowledge in reviews of manuscripts.

- J. CHRISTIAN ABAJIAN, M.D.  
 MARTIN D. ABEL, M.D.  
 STEPHEN E. ABRAM, M.D.  
 SANDOR AGOSTON, M.D.  
 MAURICE S. ALBIN, M.D.  
 HASSAN H. ALI, M.D.  
 MILTON H. ALPER, M.D.  
 BURTON M. ALTURA, Ph.D.  
 ALAN A. ARTRU, M.D.  
 NANCY ASCHER, M.D.  
 JEFFREY ASKANAZI, M.D.  
 JOHN L. ATLEE, III, M.D.  
 MICHAEL J. AVRAM, Ph.D.  
 JAMES M. BAILEY, M.D., Ph.D.  
 CEDRIC R. BAINTON, M.D.  
 PAUL G. BARASH, M.D.  
 KENNETH C. BECK, Ph.D.  
 LEWIS C. BECKER, M.D.  
 JOE BECKMAN, Ph.D.  
 ROBERT F. BEDFORD, M.D.  
 JAMES L. BENTHUYSEN, M.D.  
 JONATHAN L. BENUMOF, M.D.  
 ARNOLD J. BERRY, M.D.  
 FREDERIC A. BERRY, JR., M.D.  
 MICHAEL J. BISHOP, M.D.  
 THOMAS J. J. BLANCK, M.D.  
 ZELJKO J. BOSNJAK, Ph.D.  
 RODERICK S. BRAMWELL, M.D.  
 CLAIRE M. BRETT, M.D.  
 PHILLIP O. BRIDENBAUGH, M.D.  
 BURNELL R. BROWN, JR., M.D.,  
 Ph.D.  
 MARVIN R. BROWN, M.D.  
 CHARLES BUFFINGTON, M.D.  
 JOHN F. BUTTERWORTH, IV, M.D.  
 MICHAEL K. CAHALAN, M.D.  
 JAMES CALDWELL, M.D.  
 RODERICK K. CALVERLEY, M.D.  
 MR. CLAVER CANFELL  
 ROBERT A. CAPLAN, M.D.  
 ANGELINA CARVALHO, M.D.  
 BRIAN CASON, M.D.  
 MICHAEL CHAMPEAU, M.D.  
 DEVRON H. CHAR, M.D.  
 THEODORE G. CHEEK, M.D.  
 JACQUES E. CHELLEY, M.D., Ph.D.  
 FREDERICK W. CHENEY, JR., M.D.  
 DAVID H. CHESTNUT, M.D.  
 DAVID E. COHEN, M.D.  
 SHEILA E. COHEN, M.B.  
 JERRY G. COLLINS, Ph.D.  
 D. RYAN COOK, M.D.  
 DENNIS W. COOMBS, M.D.  
 JEFFREY B. COOPER, Ph.D.  
 RANDALL C. CORK, M.D.  
 CHARLES J. COTE, M.D.  
 MICHAEL J. COUSINS, M.D.  
 BENJAMIN G. COVINO, Ph.D.,  
 M.D.  
 ROBERT K. CRONE, M.D.
- GREGORY CROSBY, M.D.  
 ROY F. CUCCHIARA, M.D.  
 BRUCE F. CULLEN, M.D.  
 DAVID J. CULLEN, M.D.  
 PATRICIA A. DAILEY, M.D.  
 MICHAEL D'AMBRA, M.D.  
 MARK J. DAROWSKI, M.D.  
 SANJAY DATTA, M.B.  
 DONALD D. DENSON, Ph.D.  
 DAVID M. DEWAN, M.D.  
 COSMO AMERICO DI FAZIO, M.D.  
 FRANCOIS DONATI, Ph.D., M.D.  
 JUDITH H. DONEGAN, M.D., Ph.D.  
 ROBERT T. DONHAM, M.D., Ph.D.  
 KENNETH DRASNER, M.D.  
 ANDRE DRAY, Ph.D.  
 JOHN C. DRUMMOND, M.D.  
 RONALD DUECK, M.D.  
 GERALD EDELIST, M.D.  
 EDMOND I. EGER, II, M.D.  
 JAN EHRENWERTH, M.D.  
 JOHN H. EISELE, M.D.  
 NORIG ELLISON, M.D.  
 JORGE A. ESTRIN, M.D.  
 ALEX S. EVERS, M.D.  
 MARK R. FAHEY, M.D.  
 A. DONALD FINCK, M.D.  
 STEPHEN C. FINESTONE, M.D.  
 LEONARD L. FIRESTONE, M.D.  
 DENNIS M. FISHER, M.D.  
 WESLEY T. FRAZIER, M.D.  
 ALISON B. FROESE, M.D.  
 ERIC B. FURMAN, M.D.  
 DAVID M. GABA, M.D.  
 JOSEPH C. GABEL, M.D.  
 THOMAS J. GAL, M.D.  
 JAMES GALLAGHER, M.D.  
 GILLIAN GEFFIN, M.D.  
 CHARLES P. GIBBS, M.D.  
 D. DAVID GLASS, M.D.  
 DR. LOIS S. GOLD  
 WILLIAM J. GREELEY, M.D.  
 ERNEST R. GREENE, JR., M.D.,  
 Ph.D.  
 GERALD A. GRONERT, M.D.  
 BETTY L. GRUNDY, M.D.  
 SUSAN J. GUNST, Ph.D.  
 CHARLES HALES, M.D.  
 WILLIAM K. HAMILTON, M.D.  
 WILLIAM D. HAMMONDS, M.D.  
 RAAFAT S. HANNALLAH, M.D.  
 JOHN F. HANSBROUGH, M.D.  
 EVA HARNIK, M.D.  
 FREDERIC H. HELMHOLZ, JR.,  
 M.D.  
 LYNDON S. HIBBARD, Ph.D.  
 PAUL R. HICKEY, M.D.  
 ROBERT F. HICKEY, M.D.  
 WILLIAM E. HOFFMAN, Ph.D.  
 DUNCAN A. HOLADAY, M.D.
- SUK KI HONG, M.D., Ph.D.  
 THOMAS F. HORNBEIN, M.D.  
 PHILIPPE HOUSMANS, M.D.  
 ROBERT J. HUDSON, M.D.  
 SAMUEL C. HUGHES, M.D.  
 WILLIAM HURFORD, M.D.  
 DR. L. L. IVERSEN  
 JAMES R. JACOBS, Ph.D.  
 FRANCIS M. JAMES, III, M.D.  
 DAVID JANOWSKY, M.D.  
 TERRY L. JERNIGAN, Ph.D.  
 HEIDI E. JEROME, M.D.  
 ROGER A. JOHNS, M.D.  
 JORDAN KATZ, M.D.  
 RONALD L. KATZ, M.D.  
 ARTHUR S. KEATS, M.D.  
 JOAN J. KENDIG, Ph.D.  
 ROLAND L. KENNEDY, M.D.  
 WILLIAM KIMBALL, M.D., Ph.D.  
 ROBERT R. KIRBY, M.D.  
 IGOR KISSIN, M.D., Ph.D.  
 RICHARD L. KNILL, M.D.  
 DONALD D. KOBLIN, M.D.  
 AARON KOPMAN, M.D.  
 GREG KOSKI, M.D.  
 CAROL L. LAKE, M.D.  
 GEORGE H. LAMPE, M.D.  
 THOMAS A. LANE, M.D.  
 WILLIAM L. LANIER, JR., M.D.  
 DAVID R. LARACH, M.D.  
 JERROLD LERMAN, M.D.  
 JACK LEVIN, M.D.  
 DR. ROY LEVITT  
 JERROLD H. LEVY, M.D.  
 WARREN J. LEVY, M.D.  
 STUART LIND, M.D.  
 STEN G. E. LINDAHL, M.D., Ph.D.  
 LAWRENCE LITT, M.D., Ph.D.  
 JOHN D. LOESER, M.D.  
 CARL LYNCH, III, M.D.  
 DENNIS T. MANGANO, Ph.D.,  
 M.D.  
 H. MICHAEL MARSH, M.D.  
 BRYAN E. MARSHALL, M.D.  
 DONALD E. MARTIN, M.D.  
 WILLIAM R. MARTIN, M.D.  
 SADIS MATALON, Ph.D.  
 LAURENCE E. MATHER, Ph.D.  
 MERVYN MAZE, M.D.  
 RICHARD I. MAZZE, M.D.  
 WILLIAM MAZZEI, M.D.  
 WARREN R. MCKAY, M.D.  
 GRAHAM H. MC MORLAND, M.D.  
 ROBERT W. MCPHERSON, M.D.  
 EDWARD A. MEATHE  
 ROBERT G. MERIN, M.D.  
 JOHN D. MICHENFELDER, M.D.  
 WALTER L. MILLAR, M.D.  
 EDWARD D. MILLER, JR., M.D.  
 KEITH W. MILLER, Ph.D.

- JONATHAN MOSS, M.D.  
 MICHAEL F. MULROY, M.D.  
 EDWIN S. MUNSON, M.D.  
 STANLEY MURAVCHICK, M.D.  
 ROBERT R. MYERS, PH.D.  
 THOMAS E. NELSON, PH.D.  
 JOHN F. NUNN, M.D.  
 NANCY A. NUSSMEIER, M.D.  
 DANIEL NYHAN, M.D.  
 ROLLIN V. ODEN, M.D.  
 FREDRICK K. ORKIN, M.D.  
 GERARD W. OSTHEIMER, M.D.  
 GERARD M. OZANNE, M.D.  
 RICHARD J. PALAHNIUK, M.D.  
 RONALD G. PEARL, M.D.  
 CARL C. PECK, M.D.  
 COBURN D. PETERSON, JR., M.D.,  
 PH.D.  
 DANIEL M. PHILBIN, M.D.  
 JAMES H. PHILIP, M.D.  
 ELLISON C. PIERCE, JR., M.D.  
 MARIA PRAGER, M.D.  
 CEDRIC PRYS-ROBERTS, M.D.  
 DR. JESPER QVIST  
 DAN RAEMER, PH.D.  
 IRA JAY RAMPIL, M.D.  
 LAURENCE S. REISNER, M.D.  
 SEBASTIAN REIZ, M.D.  
 J. GERALD REVES, M.D.  
 JAMES L. ROBOTHAM, M.D.  
 MARK ROCKOFF, M.D.  
 MARK C. ROGERS, M.D.  
 MICHAEL F. ROIZEN, M.D.  
 MICHAEL ROSE, M.D.  
 MARK A. ROSEN, M.D.  
 HENRY ROSENBERG, M.D.
- MYER H. ROSENTHAL, M.D.  
 DR. PETER ROTHSTEIN  
 JOHN F. RYAN, M.D.  
 KIICHI SAGAWA, M.D., PH.D.  
 RUSSELL SAUDER, M.D.  
 JOHN J. SAVARESE, M.D.  
 FRANKLIN L. SCAMMAN, M.D.  
 MARK S. SCHELLER, M.D.  
 ARTHUR J. L. SCHNEIDER, M.D.  
 MARK SCHREINER, M.D.  
 PAULA A. SCHRIEMER, M.D.  
 DR. HOWARD SCHWID  
 DAG SELANDER, M.D., PH.D.  
 DANIEL I. SESSLER, M.D.  
 JOHN W. SEVERINGHAUS, M.D.  
 COLIN A. SHANKS, M.D.  
 BARRY A. SHAPIRO, M.D.  
 WILLIAM A. SHAPIRO, M.D.  
 DR. MANOHAR L. SHARMA  
 SOL M. SHNIDER, M.D.  
 STEPHEN SLOGOFF, M.D.  
 DAVID S. SMITH, M.D.  
 THEODORE C. SMITH, M.D.  
 MARTIN D. SOKOLL, M.D.  
 PETER A. SOUTHORN, M.D.  
 THEODORE H. STANLEY, M.D.  
 DONALD R. STANSKI, M.D.  
 EUGENE P. STEFFEY, VMD, PH.D.  
 DAVID J. STEWARD, M.B.  
 ROBERT K. STOELTING, M.D.  
 GARY R. STRICHARTZ, PH.D.  
 LEO STRUNIN, M.D.  
 JOAN SUMMY-LONG, PH.D.  
 DAVID B. SWEDLOW, M.D.  
 HIROSHI TAKESHITA, M.D.  
 RICHARD TEPLICK, M.D.
- GALE E. THOMPSON, M.D.  
 DANIEL M. THYS, M.D.  
 JOHN H. TINKER, M.D.  
 MICHAEL M. TODD, M.D.  
 STEVEN R. TOSONE, M.D.  
 KEVIN K. TREMPER, M.D., PH.D.  
 ANTHONY J. TREVOR, PH.D.  
 JAMES R. TRUDELL, PH.D.  
 ISSAKU UEDA, M.D.  
 LEROY VANDAM, M.D.  
 RUSSELL A. VAN DYKE, PH.D.  
 DR. JOSE VENEGAS  
 JORGEN VIBY-MOGENSEN, M.D.  
 CLARENCE F. WARD, M.D.  
 DAVID WARNER, M.D.  
 DENISE WEDEL, M.D.  
 MATTHEW B. WEINGER, M.D.  
 RICHARD B. WEISKOPF, M.D.  
 KATHLEEN WELCH, M.D.  
 DWAYNE R. WESTENSKOW,  
 PH.D.  
 RANDALL C. WETZEL, M.D.  
 SCOTT WHEELER, M.D.  
 CHARLES E. WHITCHER, M.D.  
 PAUL F. WHITE, M.D., PH.D.  
 BRIAN WHITING, M.D.  
 JEANINE WIENER-KRONISH, M.D.  
 DOUGLAS F. WILLSON, M.D.  
 ALON P. WINNIE, M.D.  
 PETER M. WINTER, M.D.  
 ALASTAIR J. J. WOOD, M.D.  
 TONY L. YAKSH, PH.D.  
 MYRON YASTER, M.D.  
 JAMES R. ZAIDAN, M.D.  
 MARK ZORNOW, M.D.  
 BRUCE L. ZURAW, M.D.
